# Supplementary material for: Using Data to Improve Programs: Assessment of a Data Quality and Use Intervention Package for Integrated Community Case Management in Malawi
Source: PubMed Central journal article supplement (PMC5620334; doi:10.9745/ghsp-d-17-00103), 2017-09-27

**Supplement 1. Wall Chart Templates to Display iccm Implementation Strength Data at the Health Surveillance Assistant (HSA) Level**

## Village Clinic at a Glance

Village clinic name: \_\_\_\_\_

HSA name: \_\_\_\_\_

HSA supervisor name: \_\_\_\_\_

Facility name: \_\_\_\_\_

Background information:

Catchment population:

Estimated # children U5:

Support and supervision monthly summary (tick if received):

| Month:            | Jan | Feb | Mar | Apr | May | Jun | July | Aug | Sep | Oct | Nov | Dec |
|-------------------|-----|-----|-----|-----|-----|-----|------|-----|-----|-----|-----|-----|
| Supervision Visit |     |     |     |     |     |     |      |     |     |     |     |     |
| Mentoring         |     |     |     |     |     |     |      |     |     |     |     |     |

### 2) Number of fast breathing cases treated in children aged 2-59 months by month

150

140

130

120

110

100

90

80

70

60

50

40

30

20

10

0

Jan   Feb   Mar   Apr   May   Jun   Jul   Aug   Sep   Oct   Nov   Dec

# of stock-out days Cotrim

# of referrals due to stockout

|                                                         |                                                         |                                                         |                                                         |                                                         |                                                         |                                                         |                                                         |                                                         |                                                         |                                                         |                                                         |
|---------------------------------------------------------|---------------------------------------------------------|---------------------------------------------------------|---------------------------------------------------------|---------------------------------------------------------|---------------------------------------------------------|---------------------------------------------------------|---------------------------------------------------------|---------------------------------------------------------|---------------------------------------------------------|---------------------------------------------------------|---------------------------------------------------------|
| <input style="width: 20px; height: 20px;" type="text"/> | <input style="width: 20px; height: 20px;" type="text"/> | <input style="width: 20px; height: 20px;" type="text"/> | <input style="width: 20px; height: 20px;" type="text"/> | <input style="width: 20px; height: 20px;" type="text"/> | <input style="width: 20px; height: 20px;" type="text"/> | <input style="width: 20px; height: 20px;" type="text"/> | <input style="width: 20px; height: 20px;" type="text"/> | <input style="width: 20px; height: 20px;" type="text"/> | <input style="width: 20px; height: 20px;" type="text"/> | <input style="width: 20px; height: 20px;" type="text"/> | <input style="width: 20px; height: 20px;" type="text"/> |
| <input style="width: 20px; height: 20px;" type="text"/> | <input style="width: 20px; height: 20px;" type="text"/> | <input style="width: 20px; height: 20px;" type="text"/> | <input style="width: 20px; height: 20px;" type="text"/> | <input style="width: 20px; height: 20px;" type="text"/> | <input style="width: 20px; height: 20px;" type="text"/> | <input style="width: 20px; height: 20px;" type="text"/> | <input style="width: 20px; height: 20px;" type="text"/> | <input style="width: 20px; height: 20px;" type="text"/> | <input style="width: 20px; height: 20px;" type="text"/> | <input style="width: 20px; height: 20px;" type="text"/> | <input style="width: 20px; height: 20px;" type="text"/> |

1

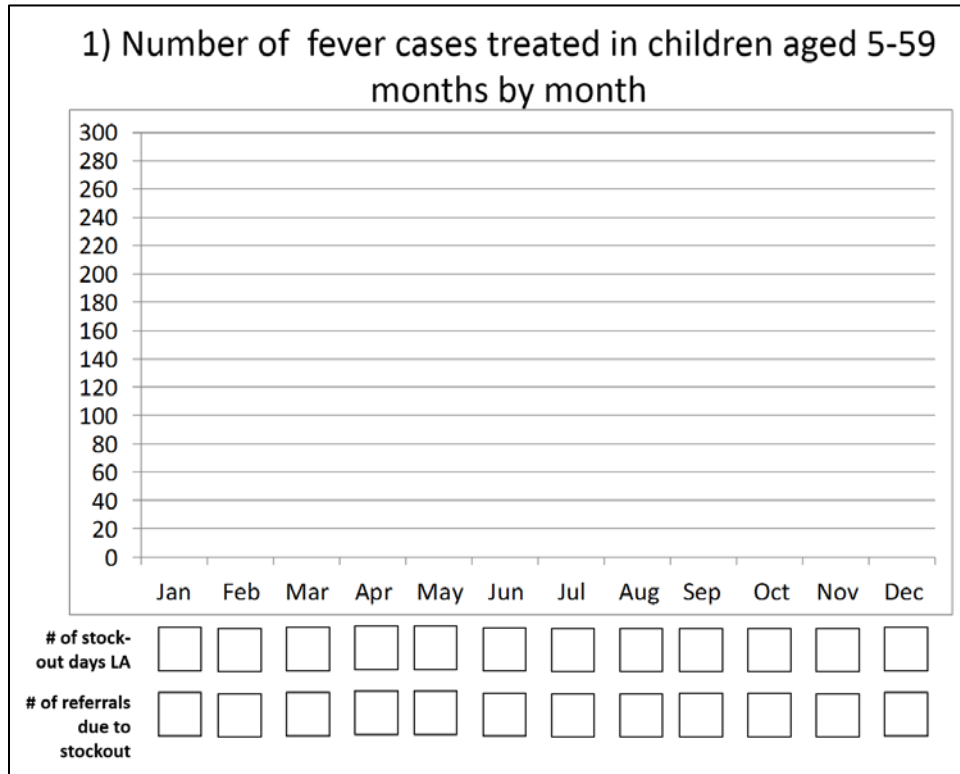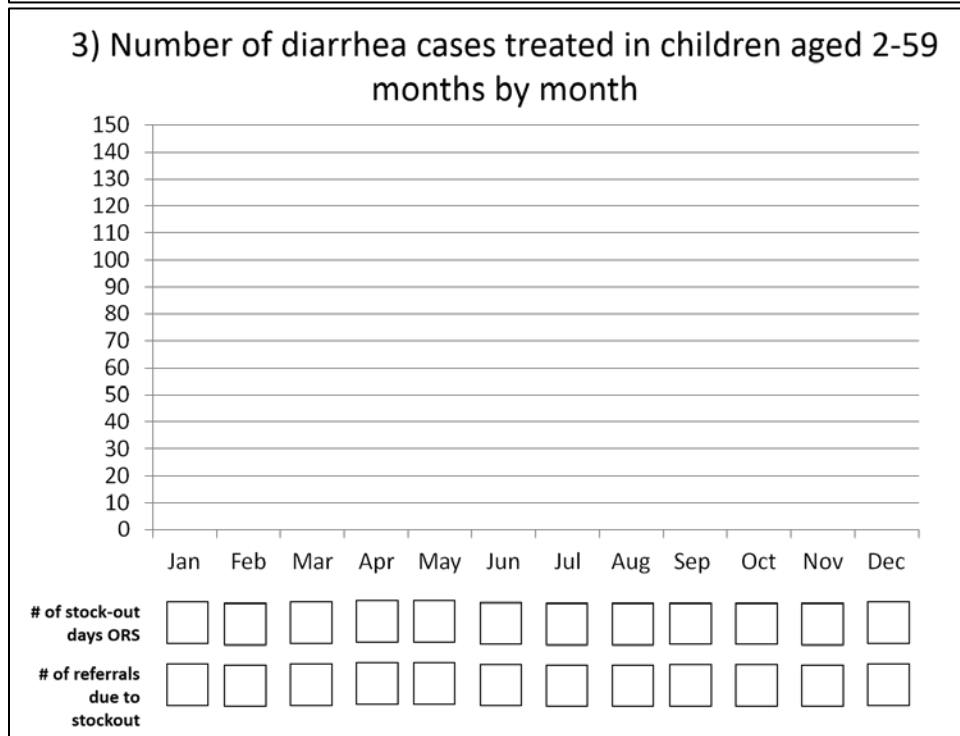

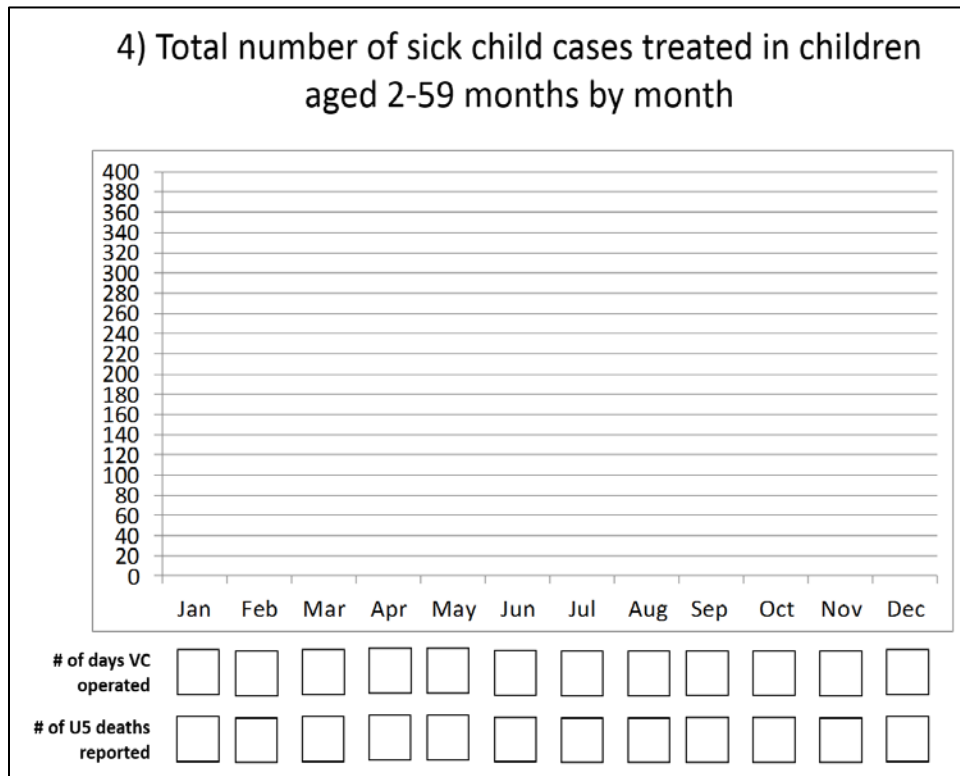

Supplement: 17-00103-Hazel-Supplement1.pdf [file 17-00103-Hazel-Supplement1.pdf]
