# Supplementary material for: Using Data to Improve Programs: Assessment of a Data Quality and Use Intervention Package for Integrated Community Case Management in Malawi
Source: PubMed Central journal article supplement (PMC5620334; doi:10.9745/ghsp-d-17-00103), 2017-09-27

**Supplement 2.** Wall Chart Templates to Display iCCM Implementation Strength Data at the Health Facility Level

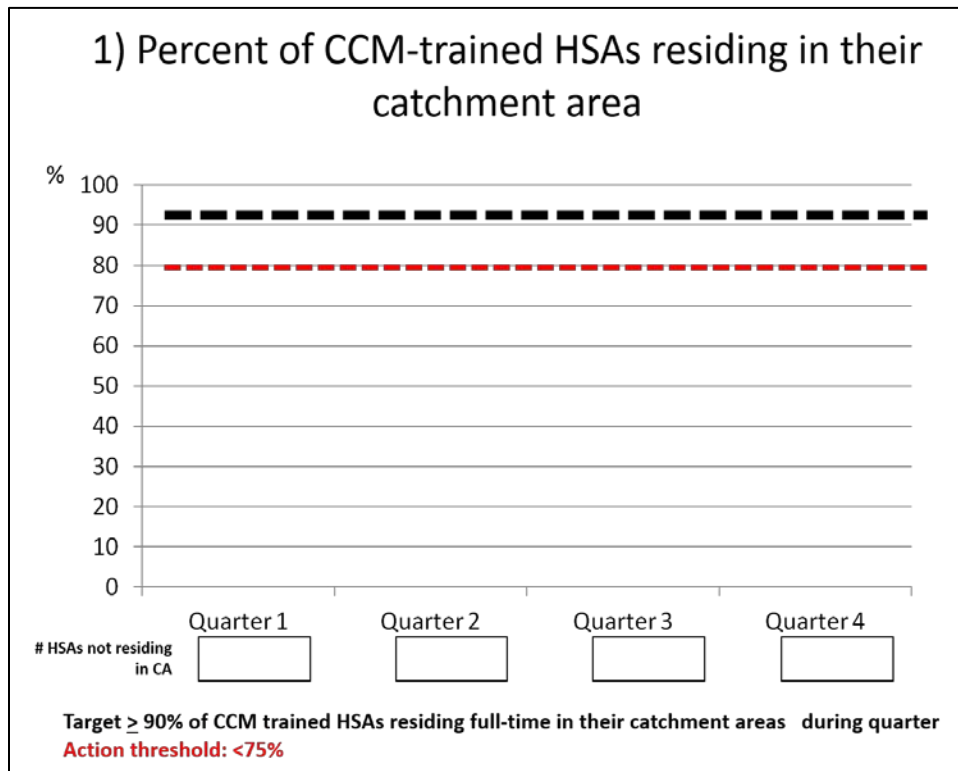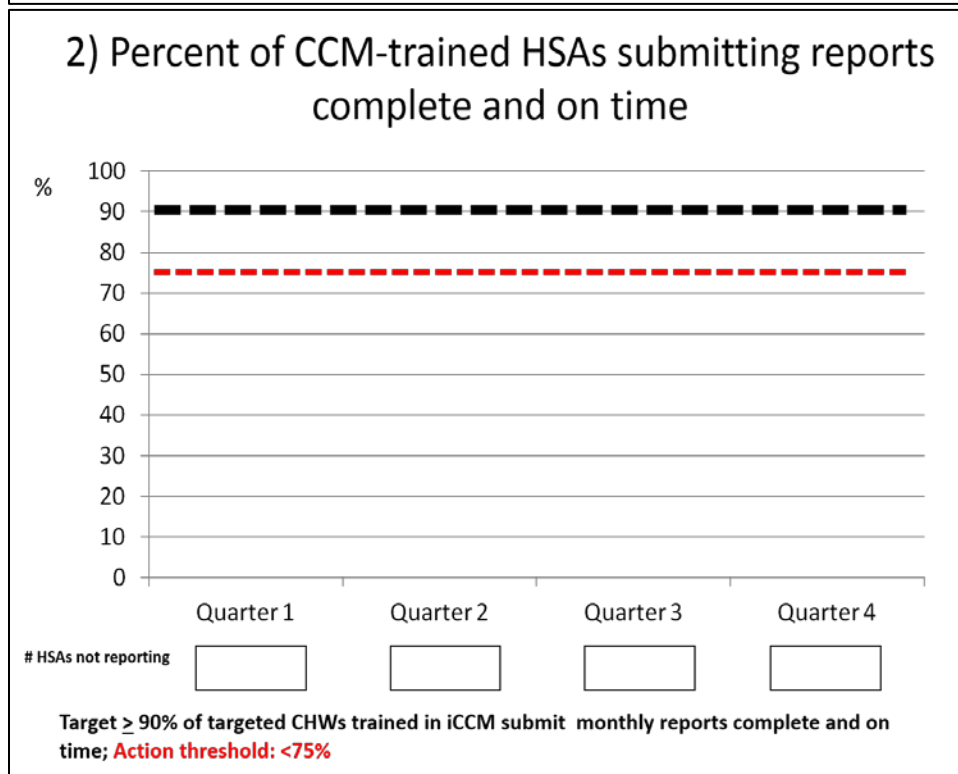

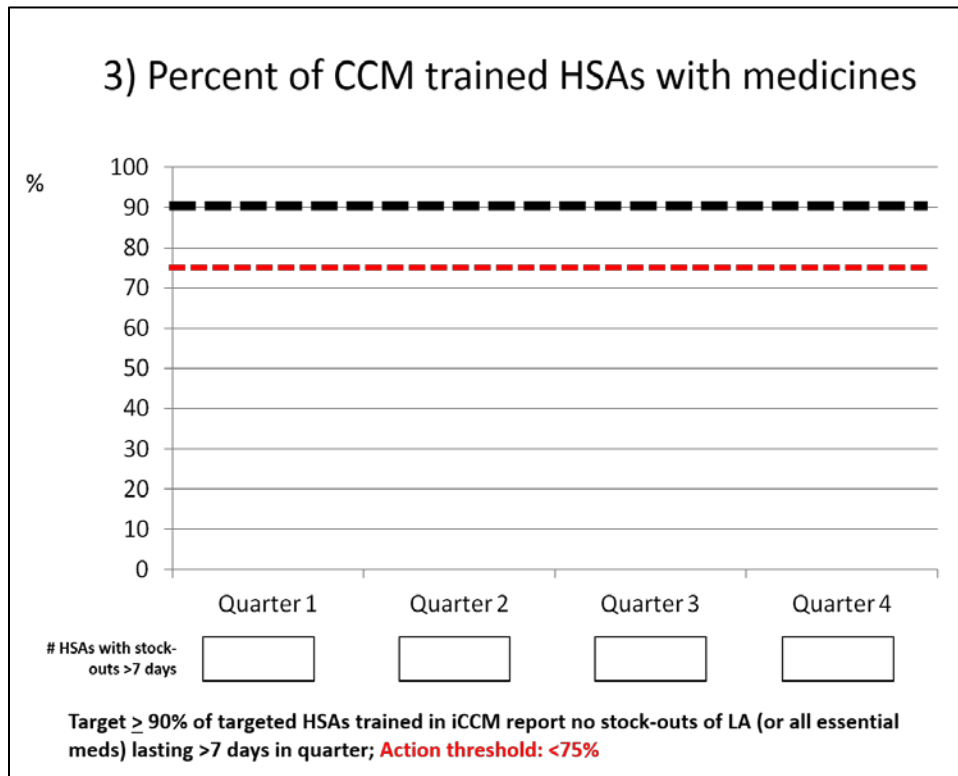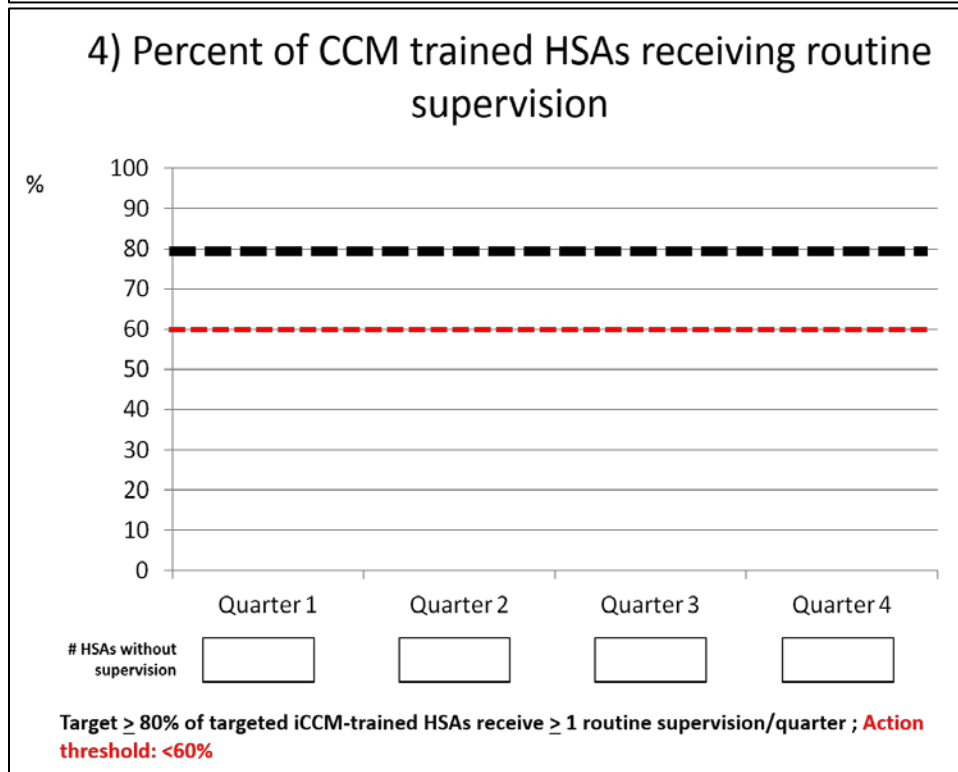

Supplement: 17-00103-Hazel-Supplement2.pdf [file 17-00103-Hazel-Supplement2.pdf]
