# Supplementary material for: Using Data to Improve Programs: Assessment of a Data Quality and Use Intervention Package for Integrated Community Case Management in Malawi
Source: PubMed Central journal article supplement (PMC5620334; doi:10.9745/ghsp-d-17-00103), 2017-09-27
Supplement: 17-00103-Hazel-Supplement3.pdf [file 17-00103-Hazel-Supplement3.pdf]

**Supplement 3.** Reporting Consistency for HSAs by District and in Total, Malawi, Baseline (2012) vs. Endline (2013)

|                           | Dowa               |                   | Kasungu            |                   | Total              |                   |                         |
|---------------------------|--------------------|-------------------|--------------------|-------------------|--------------------|-------------------|-------------------------|
|                           | Baseline<br>(n=20) | Endline<br>(n=17) | Baseline<br>(n=18) | Endline<br>(n=19) | Baseline<br>(n=38) | Endline<br>(n=36) | P<br>Value <sup>a</sup> |
| Fever cases               | 0.91<br>(0.07)     | 1.01<br>(0.02)    | 0.91<br>(0.08)     | 1.02<br>(0.02)    | 0.91<br>(0.05)     | 1.01<br>(0.01)    | .07                     |
| Diarrhea cases            | 0.87<br>(0.06)     | 1.04<br>(0.09)    | 0.95<br>(0.08)     | 1.00<br>(0.02)    | 0.91<br>(0.05)     | 1.02<br>(0.05)    | .50                     |
| Fast breathing cases      | 0.92<br>(0.04)     | 1.02<br>(0.04)    | 0.69<br>(0.10)     | 0.99<br>(0.02)    | 0.82<br>(0.05)     | 1.00<br>(0.02)    | .02                     |
| No. of male cases         | 0.97<br>(0.04)     | 0.99<br>(0.04)    | 0.81<br>(0.08)     | 1.02<br>(0.02)    | 0.91<br>(0.04)     | 1.00<br>(0.02)    | .10                     |
| No. of female cases       | 1.06<br>(0.07)     | 0.99<br>(0.03)    | 0.81<br>(0.08)     | 1.00<br>(0.01)    | 0.95<br>(0.06)     | 0.99<br>(0.02)    | .75                     |
| <b>Stocks distributed</b> |                    |                   |                    |                   |                    |                   |                         |
| Lumefantrine-artemether   | 0.95<br>(0.04)     | 1.14<br>(0.09)    | 1.12<br>(0.08)     | 1.01<br>(0.02)    | 1.03<br>(0.04)     | 1.08<br>(0.05)    | .70                     |
| Cotrimoxazole             | 0.89<br>(0.06)     | 1.02<br>(0.05)    | 0.97<br>(0.05)     | 0.87<br>(0.08)    | 0.93<br>(0.04)     | 0.95<br>(0.05)    | .69                     |
| Oral rehydration salts    | 0.89<br>(0.06)     | 1.82<br>(0.76)    | 0.91<br>(0.10)     | 1.03<br>(0.12)    | 0.92<br>(0.05)     | 1.46<br>(0.42)    | .20                     |

Abbreviations: HSA, Health Surveillance Assistant; RVR, results verification ratio; SE, standard error.

All data reported as RVR (SE). An RVR of 1.00 is perfect reporting, while less than 1.00 indicates overreporting and greater than 1.00 underreporting.

<sup>a</sup> Paired *t* test analysis was used. HSAs not interviewed at endline were excluded (n=7) from the *t* test analysis (sample size for paired *t* test, n=31).
